# Supplementary material for: Converting Galactose into the Rare Sugar Talose with Cellobiose 2-Epimerase as Biocatalyst
Source: MDPI journal article supplement (doi:10.3390/molecules23102519), 2018-10-01
Supplement: s1 [file s1]

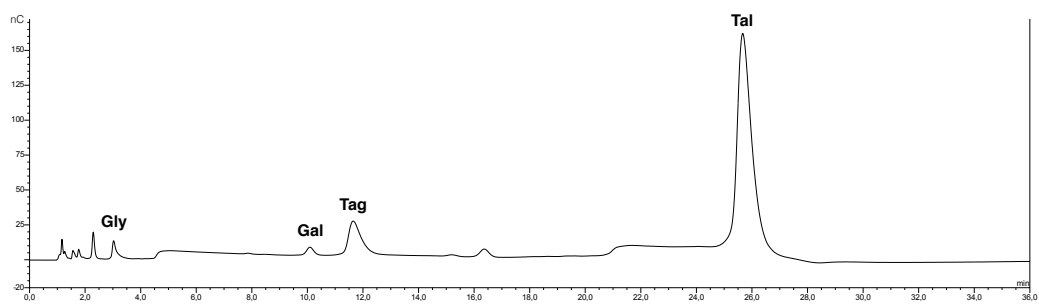

**Figure S2:** Dionex profile of the final dried mixture containing glycerol (Gly), galactose (Gal), tagatose (Tag) and talose (Tal).
