# Supplementary material for: Converting Galactose into the Rare Sugar Talose with Cellobiose 2-Epimerase as Biocatalyst
Source: MDPI journal article supplement (doi:10.3390/molecules23102519), 2018-10-01
Supplement: s1 [file s1]

| Short simulation (0,1 ns) |      |      |      | Long simulation (5 ns) |      |      |      |
|---------------------------|------|------|------|------------------------|------|------|------|
| Y124                      | Y307 | W321 | W385 | Y124                   | Y307 | W321 | W385 |
| Y                         | Y    | W    | W    | Y                      | Y    | W    | W    |
| A                         | R    | A    | T    | P                      | H    | A    | T    |
| H                         | H    | M    | Y    | V                      | K    | M    | Y    |
| L                         | A    | H    | D    |                        |      | R    | D    |
|                           | K    | Y    | K    |                        |      |      | R    |
|                           |      |      | E    |                        |      |      |      |
|                           |      |      | R    |                        |      |      |      |

**Figure S3:** Overview of the introduced amino acids on each position in both libraries. The figure represents two libraries generated by Rosetta based on starting structures originating from a molecular dynamics simulation of 0.1 and 5 ns, respectively. Residues are only displayed when they occurred in more than 5% of the sequences on a given position.
