# Supplementary material for: Converting Galactose into the Rare Sugar Talose with Cellobiose 2-Epimerase as Biocatalyst
Source: MDPI journal article supplement (doi:10.3390/molecules23102519), 2018-10-01
Supplement: s1 [file s1]

**Table S1:** Substrate concentration optimization of the *Rm*CE reaction with galactose performed at pH 6.3 and 70°C.

| Time<br>(h) | 200mM      |            | 400mM      |            | 800mM      |            | 1,2M       |             | 1,6M       |              |
|-------------|------------|------------|------------|------------|------------|------------|------------|-------------|------------|--------------|
|             | Pur(%)     | Tal(mM)    | Pur(%)     | Tal(mM)    | Pur(%)     | Tal(mM)    | Pur(%)     | Tal(mM)     | Pur(%)     | Tal(mM)      |
| 0.5         | >99        | 2.62±0.41  | >99        | 5.40±0.21  | >99        | 9.55±0.42  | >99        | 9.76±1.22   | >99        | 8.07±4.85    |
| 1           | >99        | 5.20±0.16  | >99        | 9.41±0.58  | >99        | 20.32±1.29 | >99        | 17.03±1.10  | >99        | 30.36±2.49   |
| 1.5         | 96.30±2.05 | 9.69±0.15  | 95.27±3.68 | 19.09±0.25 | 95.56±2.27 | 35.16±0.88 | 94.57±3.75 | 30.62±2.20  | 97.01±2.59 | 42.81±3.76   |
| 3           | 94.03±1.20 | 21.20±0.77 | 93.33±1.12 | 36.05±1.01 | 91.86±2.21 | 61.17±4.30 | 92.34±2.30 | 63.77±6.46  | 93.65±1.92 | 86.90 1.36   |
| 4.5         | 92.83±1.29 | 25.58 ±    |            |            | 91.45±3.58 | 76.13 ±    | 90.94±2.24 | 98.29±10.42 |            |              |
|             |            | 0.33       | 91.70±1.78 | 44.40±1.32 |            | 6.16       |            |             | 92.47±1.26 | 143.50±10.50 |
| 7           | 88.53      | 31.65      | 88.68      | 59.07      | 88.22      | 103.00     | 89.17      | 116.77      | 91.22±0.86 | 192.14±13.18 |
| 18          | 73.95      | 45.72      | 77.80      | 86.41      | 78.52      | 169.50     | 86.83      | 205.99      | 89.78±1.53 | 308.40±20.44 |
